# Supplementary material
Source: PubMed Central journal article supplement (PMC3748980)
Supplement: jbjs_95_10_881_ds01.pdf [file jbjs_95_10_881_ds01.pdf]

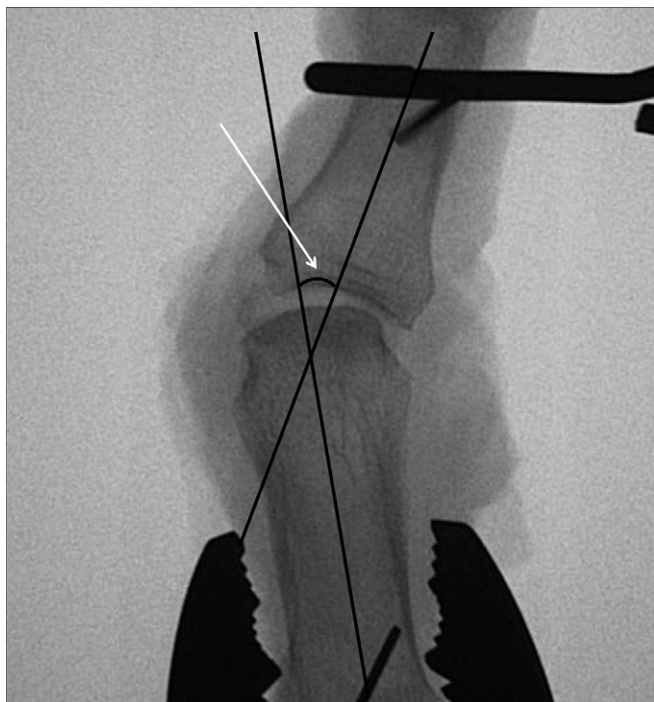

Fig. E-1  
 Measurement of metacarpophalangeal joint angulation.

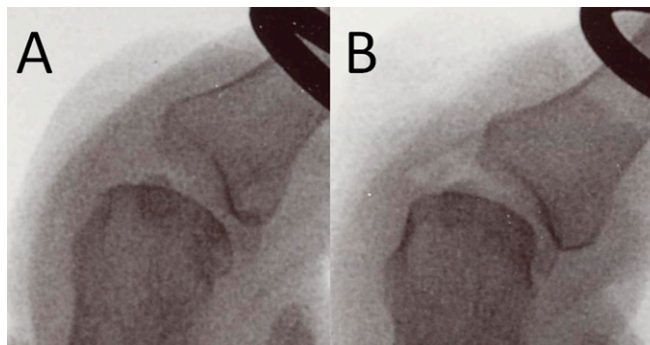

Fig. E-2  
 Posteroanterior images of joint angulation by ulnar gapping following release of the proper ulnar collateral ligament (**Fig. E-2A**) and angulation with radial translation following release of the proper and accessory ulnar collateral ligaments (**Fig. E-2B**).

| TABLE E-1 Baseline Radiographic Parameters in Stressed Thumbs with an Intact Ulnar Collateral Ligament |                      |         |         |
|--------------------------------------------------------------------------------------------------------|----------------------|---------|---------|
|                                                                                                        | Mean and Stand. Dev. | Minimum | Maximum |
| Maximal joint flexion (°)                                                                              | 53 ± 12              | 34      | 78      |
| Maximal joint hyperextension (°)                                                                       | 21.7 ± 14            | -18     | 54      |
| Maximal flexion-extension arc (°)                                                                      | 75 ± 20              | 27      | 116     |
| Valgus angulation* (°)                                                                                 | 20 ± 8               | 1       | 40      |
| Ulnar gap* (mm)                                                                                        | 5.1 ± 1.3            | 2.3     | 8.0     |
| Radial translation* (mm)                                                                               | 1.5 ± 0.9            | -0.3    | 3.4     |

\*Metacarpophalangeal joint at 0° of flexion.
